# Supplementary material
Source: MDPI journal article supplement (https://www.mdpi.com/2071-1050/12/22/9327)
Supplement: s1 [file s1]

## Article

# A Framework of Key Growth Factors for Small Enterprises Operating at the Base of the Pyramid

Michael D. van der Merwe <sup>1</sup>, Sara S. Grobbelaar <sup>2,\*</sup>, Isabel A. Meyer <sup>3</sup>, Cornelius L. Schutte <sup>1</sup> and Konrad H. von Leipzig <sup>1</sup>

<sup>1</sup> Department of Industrial Engineering, Stellenbosch University, Stellenbosch 7600, South Africa; 16000293@sun.ac.za (M.D.v.d.M.); corne@sun.ac.za (C.L.S.); kvl@sun.ac.za (K.H.v.L.)

<sup>2</sup> Department of Industrial Engineering, Stellenbosch University AND DST-NRF Centre of Excellence in Scientometrics and Science, Technology and Innovation Policy (SciSTIP), Stellenbosch 7600, South Africa

<sup>3</sup> Department of Industrial Engineering, Stellenbosch University AND CSIR Smart Mobility, Pretoria, 0001, South Africa; imeyer@csir.co.za

\* Correspondence: ssgrobbelaar@sun.ac.za

Received: 20 August 2020; Accepted: 10 October 2020; Published: date

## Supplementary A Survey of Best Practices in South African Social Enterprises

Please note that the survey was arrived at by eliminating any potential sources of overlap and incorporating the framework's primary requirements. The writing in red signifies those primary requirements that were incorporated into the others to shorten the survey.

### Demographics

1. Under which industry is your enterprise classified (according to the Standard Industrial Classification)?

[ACC] Accommodation and food service activities

[ADM] Administrative and support service activities

[AGR] Agriculture, forestry and fishing

[ART] Arts, entertainment and recreation

[CON] Construction

[EDU] Education

[ELE] Electricity, gas, steam and air conditioning supply

[FIN] Financial and insurance activities

[HUM] Human health and social work activities

[INF] Information and communication

[MAN] Manufacturing

[MIN] Mining and quarrying

[OTH] Other service activities

[PRO] Professional, scientific and technical activities

[PUB] Public administration and defence; compulsory social security

[REA] Real estate activities

[TRA] Transportation and storage

[WAT] Water supply; sewerage, waste management and remediation activities

[WHO] Wholesale and retail trade; repair of motor vehicles and motorcycles

Other comment field

2. What is your official position within your enterprise?

Comment box

3. How many permanent employees work for your enterprise?

Comment box

4. How many temporary employees work for your enterprise?

Comment box

5. How many employees work for your enterprise in total?

*Calculation: add number of permanent employees to number of temporary employees*

6. What size category is the SMME?

*In accordance with standard industrial classifications and total employee count:*

*Micro*

*Very small*

*Small*

*Medium*

*Large*

7. In what year was your enterprise founded?

*Comment box*

8. What is the age of your enterprise in years in the year 2017?

*Calculation: subtract year founded from 2017*

9. What category best describes the current growth rate of your enterprise (i.e., this year's sales less last year's sales as a fraction of last year's sales)?

*Dropdown options with Likert from 1 to 6:*

*[6] More than doubled (i.e., better than 106% per annum)*

*[5] More than inflation (between 6% and 106% per annum)*

*[4] In line with inflation (i.e., close to 6% per annum)*

*[3] Definitely declining (i.e., between 6% and -44% per annum)*

*[2] Less than half of previous year (i.e., worse than -44% per annum)*

*[1] My enterprise was only founded this year*

10. For how many consecutive years has your enterprise experienced positive growth?

*Dropdown options:*

*[1] 1 year*

*[2] 2 years*

*[3] 3 years*

*[4] 4 years*

*[5] 5 years*

*[6] 6 years*

*[7] 7 years*

*[8] Over 7 years*

*[0] Our enterprise has never experienced positive growth yet*

*[0] Our enterprise is not currently experiencing positive growth but has done in the past*

11. Which roles do the poor undertake in the value creation process of your enterprise?

*Multiple choice with more than one option:*

*Customers (i.e., benefiting from value offerings sold to them)*

*Clients (i.e., customers receiving a professional service)*

*Co-creators (i.e., strategic partners)*

*Employees (i.e., being paid to work for the enterprise)*

### **Growth impact and managerial difficulty**

The following options are given for answering the questions on this page.

With regards to the impact each best practice has on growth:

| <b>Growth impact options [GI]</b>   | <b>Likert scale value</b> |
|-------------------------------------|---------------------------|
| We have not addressed this          | 1                         |
| Consistently negative growth impact | 2                         |
| Costs usually outweigh benefits     | 3                         |
| Negligible growth impact            | 4                         |
| Benefits usually outweigh costs     | 5                         |
| Consistently positive growth impact | 6                         |

With regards to how difficult each best practice is to manage effectively:

| Managerial difficulty options [MD] | Likert scale value |
|------------------------------------|--------------------|
| Not addressed                      | 1                  |
| Trivial to manage                  | 2                  |
| Easy to manage                     | 3                  |
| Negligible difficulty              | 4                  |
| Difficult to manage                | 5                  |
| Complex to manage                  | 6                  |

12. Please rate both how you perceive the following best practices impact the growth of your enterprise and how difficult managing the best practices is:

| Best practices                                                                                                         | Growth impact [GI] | Managerial difficulty [MD] |
|------------------------------------------------------------------------------------------------------------------------|--------------------|----------------------------|
| Business modelling in planning and amending the value creation process                                                 | 12BMGI             | 12BMMD                     |
| Pursuing sustainable development to ensure social, economic, and environmental development trade-offs are managed      | 12SDGI             | 12SDMD                     |
| Following a clear strategy so as to keep one step ahead of competitors                                                 | 12STGI             | 12STMD                     |
| Collaborating with strategic alliance partners to accrue maximum benefits for the firm                                 | 12SAGI             | 12SAMD                     |
| Innovating to improve existing value offerings and arrive at new offerings for maximum value creation for customers    | 12INGI             | 12INMD                     |
| Marketing to ensure that the value offering is brought to market in the right way so as to maximise market penetration | 12MAGI             | 12MAMD                     |

### Importance and adequacy

The following options are given for answering the questions on this page.

To answer how much of a priority each concern is in terms of time given to its planning and regarded impact on enterprise growth (i.e., importance and urgency):

| Priority level in planning [PL] | Likert scale value |
|---------------------------------|--------------------|
| Not planned for                 | 1                  |
| Unimportant and not urgent      | 2                  |
| Unimportant but urgent          | 3                  |
| Important but not urgent        | 4                  |
| Important and urgent            | 5                  |

To answer how well each concern is implemented in terms of the tools/structures/methods used when it is addressed (i.e., adequacy of the tools, structures, or methods used by management to ensure each is addressed):

| Manner of implementation [MI]   | Likert scale value |
|---------------------------------|--------------------|
| Not addressed at all            | 1                  |
| Not addressed practically       | 2                  |
| Addressed indirectly/implicitly | 3                  |
| Addressed directly/explicitly   | 4                  |

### Business modelling (BM)

The business model describes the core logic for the creation and capturing of value

~ Zott and Amit (2010)

13. How well does your enterprise articulate its value propositions (i.e., how well do you describe the products and services that specific customer segments gain value from)?

Dropdown options with Likert from 1 to 4:

- [1] Not described at all
- [2] Inadequately described
- [3] Adequately described
- [4] Very clearly described

14. Please rate both the priority you place on planning for each consideration and the manner in which each consideration is implemented in your enterprise:

| Action statements                                                                                                                                                                                                                            | Priority level in planning [PL] | Manner of implementation [MI] |
|----------------------------------------------------------------------------------------------------------------------------------------------------------------------------------------------------------------------------------------------|---------------------------------|-------------------------------|
| Using business modelling as a tool for describing the core logic for creating and capturing value                                                                                                                                            | 14BM01PL                        | 14BM01MI                      |
| *Identifying customer segments that the enterprise aims to reach and serve                                                                                                                                                                   | 14BM02PL                        | 14BM02MI                      |
| ^Defining channels to understand how you reach and communicate with customer segments when delivering a product/service                                                                                                                      | 14BM03PL                        | 14BM03MI                      |
| ∞Identifying customer relationships the enterprise has with each customer segment                                                                                                                                                            | 14BM04PL                        | 14BM04MI                      |
| ®Estimating revenue streams by calculating the predicted revenues less costs to determine likely earnings and estimating the cost structure by calculating and describing all of the costs that are incurred in operating the business model | 14BM05PL                        | 14BM05MI                      |
| Determining key resources that are required to make the business model work (financial, human, intellectual, physical)                                                                                                                       | 14BM06PL                        | 14BM06MI                      |
| ~Identifying key partnerships that help make the business model work (i.e., the network of suppliers and partners)                                                                                                                           | 14BM07PL                        | 14BM07MI                      |

### Sustainable development (SD)

*Development which ensures that it meets the needs (global economic, environmental, and social) of the present without compromising the ability of future generations to meet their own needs.*

~ Brundtland (1987)

15. Please rate both the priority you place on planning for each consideration and the manner in which each consideration is implemented in your enterprise:

| Action statements                                                                                                                | Priority in planning [PL] | Manner of implementation [MI] |
|----------------------------------------------------------------------------------------------------------------------------------|---------------------------|-------------------------------|
| Practically addressing economic needs of the poor                                                                                | 15SD01PL                  | 15SD01MI                      |
| Practically addressing social needs of the poor                                                                                  | 15SD02PL                  | 15SD02MI                      |
| Practically addressing environmental needs of the poor                                                                           | 15SD03PL                  | 15SD03MI                      |
| ®Evaluating and promoting the long term economic feasibility of the business plan (i.e., ensuring it generates a lasting profit) | 15SD04PL                  | 15SD04MI                      |
| Evaluating and promoting the long term social feasibility of the business plan (i.e., ensuring it impacts society beneficially)  | 15SD05PL                  | 15SD05MI                      |
| Evaluating and promoting the long term environmental feasibility of the business plan (i.e., ensuring it is renewable)           | 15SD06PL                  | 15SD06MI                      |

### Strategy (ST)

*A plan, method, or series of manoeuvres or stratagems for obtaining a specific goal or result.*

~ Andrews and Roland (2012)

16. Which type of strategic stance would you say your enterprise exhibits the most:

- [1] We do not follow any strategy per se
- [2] A competitive approach (developing better products/services to beat competitors)
- [3] A non-competitive approach (developing altogether new and different products/services to cut out competitors)

17. Please rate both the priority you place on planning for each consideration and the manner in which each consideration is implemented in your enterprise:

| Action statements                                                                                                                                                                                                                                          | Priority in planning [PL] | Manner of implementation [MI] |
|------------------------------------------------------------------------------------------------------------------------------------------------------------------------------------------------------------------------------------------------------------|---------------------------|-------------------------------|
| Documenting a clear strategy to obtain specific goals and results                                                                                                                                                                                          | 17ST01PL                  | 17ST01MI                      |
| Outlining the strategic profile of the enterprise, industry, and current and potential competitors (i.e., what is invested in, competitive factors/offerings, what may need to be invested in in future)                                                   | 17ST02PL                  | 17ST02MI                      |
| Addressing key organisational hurdles for optimal strategy implementation (e.g., motivational, resource)                                                                                                                                                   | 17ST03PL                  | 17ST03MI                      |
| Determining competitive factors which can minimise or cut out competition (i.e., eliminating and reducing factors the industry competes in to make cost savings, and creating and raising factors the industry hasn't offered yet to increase buyer value) | 17ST04PL                  | 17ST04MI                      |
| Getting into the field and gaining first-hand experience by seeing the value offering being used by the buyer/user, and actively communicating with buyers, suppliers, and co-creators                                                                     | 17ST05PL                  | 17ST05MI                      |
| Creating new demand (market space) for products/services by looking to non-customers, whilst focusing on both the differences and commonalities among what buyers value                                                                                    | 17ST06PL                  | 17ST06MI                      |
| α Following a step-by-step approach to strategy by:                                                                                                                                                                                                        |                           |                               |
| α maximising buyer acceptability when designing products/services;                                                                                                                                                                                         | 17ST07PL                  | 17ST07MI                      |
| α ensuring affordability to the buyer by determining the right strategic pricing (then meeting the target cost);                                                                                                                                           | 17ST08PL                  | 17ST08MI                      |
| α ensuring accessibility (and availability) of value offerings to buyers, and;                                                                                                                                                                             | 17ST09PL                  | 17ST09MI                      |
| α increasing awareness of buyers and fostering adoption with key stakeholders by designing adequate means of promotion                                                                                                                                     | 17ST10PL                  | 17ST10MI                      |

### Strategic alliances (SA)

*Strategic alliances are purposive strategic relationships between independent firms that share compatible goals, strive for mutual benefits, and acknowledge a high level of mutual dependence.*

~ Mohr and Spekman (1994)

18. Please rate both the priority you place on planning for each consideration and the manner in which each consideration is implemented in your enterprise:

| Action statements                                                                                                                                                                                                                             | Priority in planning [PL] | Manner of implementation [MI] |
|-----------------------------------------------------------------------------------------------------------------------------------------------------------------------------------------------------------------------------------------------|---------------------------|-------------------------------|
| Forming strategic alliances to accrue mutual benefits (resource access, synergies, lower costs) from organisations with compatible goals                                                                                                      | 18SA01PL                  | 18SA01MI                      |
| ~Searching for potential partner(s) by:                                                                                                                                                                                                       |                           |                               |
| ~actively seeking alliance partners in the social sector (e.g., NPOs, local communities);                                                                                                                                                     | 18SA02PL                  | 18SA02MI                      |
| ~actively seeking alliance partners in the private sector (e.g., private businesses including social enterprises), and;                                                                                                                       | 18SA03PL                  | 18SA03MI                      |
| ~actively seeking alliance partners in the public sector (e.g., government, state-owned enterprises)                                                                                                                                          | 18SA04PL                  | 18SA04MI                      |
| Ranking and selecting a suitable partner by weighing their relative pros and cons and choosing the most complementary one                                                                                                                     | 18SA05PL                  | 18SA05MI                      |
| Defining rights and duties when designing the alliance by forming a contract and negotiating accordingly (e.g., negotiating payments in contracts, length of contracts, resource specificity, negotiation costs, maximising bargaining power) | 18SA06PL                  | 18SA06MI                      |
| Closely monitoring/managing the alliance throughout its life span by:                                                                                                                                                                         |                           |                               |
| developing clear methods of communicating and coordinating with partners (engagement spaces);                                                                                                                                                 | 18SA07PL                  | 18SA07MI                      |
| gaining access to (complementary) resources of partners;                                                                                                                                                                                      | 18SA08PL                  | 18SA08MI                      |
| gaining access to complementary contextual knowledge of partners;                                                                                                                                                                             | 18SA09PL                  | 18SA09MI                      |

|                                                                                                                                                                                                 |          |          |
|-------------------------------------------------------------------------------------------------------------------------------------------------------------------------------------------------|----------|----------|
| establishing routines for the co-creation of knowledge with partners;                                                                                                                           | 18SA10PL | 18SA10MI |
| outlining procedures for managing intellectual property (IP);                                                                                                                                   | 18SA11PL | 18SA11MI |
| addressing cultural differences between partner firms (e.g., values, goals);                                                                                                                    | 18SA12PL | 18SA12MI |
| acting so as to minimise risk and opportunistic behaviour of partners (e.g., protecting proprietary assets, being clear about objectives to avoid incompatibility and performance risks, etc.); | 18SA13PL | 18SA13MI |
| acting so as to promote trust with/between alliance partners;                                                                                                                                   | 18SA14PL | 18SA14MI |
| gaining increased social status in the public eye through association with partners;                                                                                                            | 18SA15PL | 18SA15MI |
| enhancing relationship building with select communities by taking advantage of the partnership;                                                                                                 | 18SA16PL | 18SA16MI |
| safeguarding against the key competencies of the firm being undermined by or through partners, and;                                                                                             | 18SA17PL | 18SA17MI |
| ensuring transaction costs are minimised as a result of the partnership                                                                                                                         | 18SA18PL | 18SA18MI |
| Evaluating the alliance to determine if it should be renewed, renegotiated or terminated                                                                                                        | 18SA19PL | 18SA19MI |

### Innovation (IN)

*Innovation can be seen as the process by which new ideas are turned into reality and existing offerings are improved, maximising the value created by and captured from them.*

~ Anonymous

19. Which innovation stance does your enterprise exhibit?

*Dropdown options with Likert from 1 to 5:*

- [1] Non-existent (the enterprise does not have any detailed approach to managing innovation at present)
- [2] Passive (the firm tends to pick up on the relevant signals whilst ensuring resources are focused on the right improvements)
- [3] Reactive (the enterprise recognises in which direction change is most needed when they detect the need for change, and form strategic alliances to aid in these changes)
- [4] Strategic (the enterprise pursues and develops routes to fostering radical innovations so as to redefine markets, seeking knowledge which is new and beyond traditional industry boundaries)
- [5] Creative (the enterprise exploits technical and market knowledge, so as to extend and diversify networks into other sectors and change how organisations compete)

20. Please rate both the priority you place on planning for each consideration and the manner in which each consideration is implemented in your enterprise:

| Action statements                                                                                                                                                                                                                                                                                                           | Priority in planning [PL] | Manner of implementation [MI] |
|-----------------------------------------------------------------------------------------------------------------------------------------------------------------------------------------------------------------------------------------------------------------------------------------------------------------------------|---------------------------|-------------------------------|
| Innovating to bring about new ideas and improve existing offerings so as to maximise the created and captured value                                                                                                                                                                                                         | 20IN01PL                  | 20IN01MI                      |
| Determining what is needed and outlining parameters to guide the innovation search process (e.g., setting search boundaries wrt if product/process/position/paradigm innovation is needed; identifying triggers of discontinuity; industry maturity impact)                                                                 | 20IN02PL                  | 20IN02MI                      |
| Generating ideas through searching for innovative solutions to social problems by:<br>utilising multiple sources of innovation (e.g., users as innovators, design-led innovation, forecasting, etc.) and various search tools and mechanisms (e.g., working with alliance partners, sending out scouts, deep diving, etc.); | 20IN03PL                  | 20IN03MI                      |
| engaging with the poor from the bottom up and developing solutions together                                                                                                                                                                                                                                                 | 20IN04PL                  | 20IN04MI                      |

|                                                                                                                                                                                                               |          |          |
|---------------------------------------------------------------------------------------------------------------------------------------------------------------------------------------------------------------|----------|----------|
| Ranking and then selecting the top innovative solution which is ideally:<br>disruptive to existing norms; requires distinctive competencies of the<br>enterprise, and; dissimilar to offerings of competitors | 20IN05PL | 20IN05MI |
| Developing a high quality innovative solution by:<br>encouraging incrementalism when developing innovative solutions<br>(step-by-step modification of objectives and resources when new<br>evidence arrives); | 20IN06PL | 20IN06MI |
| setting in place stopping criteria so as to terminate too costly/unfruitful<br>ideas early on;                                                                                                                | 20IN07PL | 20IN07MI |
| testing the robustness of proposed solutions to a range of assumptions,<br>and;                                                                                                                               | 20IN08PL | 20IN08MI |
| reducing risk (key technical and market uncertainties) before<br>committing to full-scale commercialisation procedures                                                                                        | 20IN09PL | 20IN09MI |
| Capturing maximal value from the innovation by:<br>maximising compatibility (consistency) with existing norms and values<br>of the buyer/user when designing innovative solutions;                            | 20IN10PL | 20IN10MI |
| minimising the need for new skill and knowledge to be developed<br>before user is able to use it/benefit from the innovative solution;                                                                        | 20IN11PL | 20IN11MI |
| making outcome/results of innovation clearly visible to buyer/user, and;                                                                                                                                      | 20IN12PL | 20IN12MI |
| enabling potential adopters to experiment with the innovation before<br>investing                                                                                                                             | 20IN13PL | 20IN13MI |

### Marketing (MA)

*Marketing is the activity, set of institutions, and processes for creating, communicating, delivering, and exchanging offerings that have value for customers, clients, partners, and society at large.*

~ Keefe (2013)

21. Please rate both the priority you place on planning for each consideration and the manner in which each consideration is implemented in your enterprise:

| Action statements                                                                                                                                                                                                                                         | Priority in<br>planning [PL] | Manner of<br>implementation<br>[MI] |
|-----------------------------------------------------------------------------------------------------------------------------------------------------------------------------------------------------------------------------------------------------------|------------------------------|-------------------------------------|
| Marketing to ensure the creating, communicating, delivering and<br>exchanging of value offerings for customers, clients, partners and<br>society                                                                                                          | 21MA01PL                     | 21MA01MI                            |
| Fostering a customer-centric enterprise by focusing on customers first<br>and foremost, then frontline people, and then middle management                                                                                                                 | 21MA02PL                     | 21MA02MI                            |
| *Targeting and learning more about specific market segments by:<br>*using traditional segmentation criteria (i.e., measurable, substantial,<br>accessible, differentiable, and actionable);                                                               | 21MA03PL                     | 21MA03MI                            |
| *using low-income market segmentation criteria (i.e., living standard<br>(low-income, subsistence, and extreme poverty) and value creation<br>role (consumers, co-producers/creators, or clients));                                                       | 21MA04PL                     | 21MA04MI                            |
| *choosing a suitable segmentation level (i.e., full market coverage,<br>multiple segment specialisation, single segment concentration, or<br>individual marketing), and;                                                                                  | 21MA05PL                     | 21MA05MI                            |
| ∞identifying customer relationships the enterprise has with each<br>customer segment                                                                                                                                                                      | 21MA06PL                     | 21MA06MI                            |
| Developing suitable branding (memorable, meaningful, and likeable)<br>and brand management capability (transferrable, adaptable, and<br>protectable)                                                                                                      | 21MA07PL                     | 21MA07MI                            |
| ^Finding existing and developing new channels for communicating<br>(messages to and from target buyers), distributing (value<br>propositions that display, deliver, and sell them to buyers/users), and<br>servicing (transactions with potential buyers) | 21MA08PL                     | 21MA08MI                            |
| Exploiting multiple forms of exchange including structured,<br>networked, pure, and centralised exchange (e.g., using standardised                                                                                                                        | 21MA09PL                     | 21MA09MI                            |

|                                                                                 |          |          |
|---------------------------------------------------------------------------------|----------|----------|
| processes, social links, trade centres, and political influence respectively)   |          |          |
| α Developing a suitable and realistic marketing mix by:                         |          |          |
| α testing that products/services are developed to be acceptable to buyers;      | 21MA10PL | 21MA10MI |
| α testing that pricing is set to be affordable to buyers;                       | 21MA11PL | 21MA11MI |
| α testing that placement is chosen to be accessible (available) to buyers, and; | 21MA12PL | 21MA12MI |
| α testing that promotion means are designed to increase awareness of buyers     | 21MA13PL | 21MA13MI |

## Supplementary B Literary Sources

### 1 B.1 Titles, references, and ID numbers of literary sources (IWs and KIWs)

The literary sources, including titles, references, and their associated ID numbers are shown in detail in Table B1.

**Table B1.** Titles, references, and ID numbers of literary sources (IWs and KIWs).

| Title                                                                                                                                        | Reference                         | ID |
|----------------------------------------------------------------------------------------------------------------------------------------------|-----------------------------------|----|
| <i>Who creates jobs? Small versus large versus young</i>                                                                                     | Haltiwanger et al. (2013)         | 1  |
| <i>Entrepreneurial ecosystems and growth oriented entrepreneurship</i>                                                                       | Mason and Brown (2014)            | 2  |
| <i>Arriving at the high-growth firm</i>                                                                                                      | Delmar et al. (2003)              | 3  |
| <i>Organizational growth: Linking founding team, strategy, environment, and growth among US semiconductor ventures, 1978-1988</i>            | Eisenhardt and Schoonhoven (1990) | 4  |
| <i>Initial human and financial capital as predictors of new venture performance</i>                                                          | Cooper et al. (1994)              | 5  |
| <i>A multidimensional model of venture growth</i>                                                                                            | Baum et al. (2001)                | 6  |
| <i>Strategies for superior performance under adverse conditions: A focus on small and medium-sized high-growth firms</i>                     | Bamiatzi and Kirchmaier (2014)    | 7  |
| <i>Clarifying the entrepreneurial orientation construct and linking it to performance</i>                                                    | Lumpkin and Dess (1996)           | 8  |
| <i>Entrepreneurial orientation and small business performance: a configurational approach</i>                                                | Wiklund and Shepherd (2005)       | 9  |
| <i>Competitive strategy: Techniques for analyzing industries and competitors</i>                                                             | Porter (1980)                     | 10 |
| <i>The Theory of the Growth of the Firm</i>                                                                                                  | Penrose (1995)                    | 11 |
| <i>Internal capabilities, external networks, and performance: a study on technology-based ventures</i>                                       | Lee et al. (2001)                 | 12 |
| <i>Is innovation always beneficial? A meta-analysis of the relationship between innovation and performance in SMEs</i>                       | Rosenbusch et al. (2011)          | 13 |
| <i>A quantitative content analysis of the characteristics of rapid-growth firms and their founders</i>                                       | Barringer et al. (2005)           | 14 |
| <i>Age, size, growth and survival: UK companies in the 1980s</i>                                                                             | Dunne and Hughes (1994)           | 15 |
| <i>Effects of age at entry, knowledge intensity, and imitability on international growth</i>                                                 | Autio et al. (2000)               | 16 |
| <i>Innovation, growth and survival</i>                                                                                                       | Audretsch (1995)                  | 17 |
| <i>Linking two dimensions of entrepreneurial orientation to firm performance: The moderating role of environment and industry life cycle</i> | Lumpkin and Dess (2001)           | 18 |
| <i>Building an integrative model of small business growth</i>                                                                                | Wiklund et al. (2009)             | 19 |
| <i>Founder competence, the environment and venture performance</i>                                                                           | Chandler and Hanks (1994)         | 20 |
| <i>Aspiring for, and achieving growth: the moderating role of resources and opportunities</i>                                                | Wiklund and Shepherd (2003)       | 21 |
| <i>New venture growth: A review and extension</i>                                                                                            | Gilbert et al. (2006)             | 22 |
| <i>The growth of firms: A survey of theories and empirical evidence</i>                                                                      | Coad (2009)                       | 23 |
| <i>Legal form, growth and exit of West German firms—empirical results for manufacturing, construction, trade and service industries</i>      | Harhoff et al. (1998)             | 24 |



| <b>Title</b>                                                                                                                      | <b>Reference</b>               | <b>ID</b> |
|-----------------------------------------------------------------------------------------------------------------------------------|--------------------------------|-----------|
| <i>Continued entrepreneurship: Ability, need, and opportunity as determinants of small firm growth</i>                            | Davidsson (1991)               | 25        |
| <i>Innovation and firm growth in high-tech sectors: A quantile regression approach</i>                                            | Coad and Rao (2008)            | 26        |
| <i>Linking prefunding factors and high-technology venture success: An exploratory study</i>                                       | Roure and Maidique (1986)      | 27        |
| <i>Understanding the dynamics of new venture top management teams: cohesion, conflict, and new venture performance</i>            | Ensley et al. (2002)           | 28        |
| <i>The relationship of entrepreneurial traits, skill, and motivation to subsequent venture growth</i>                             | Baum and Locke (2004)          | 29        |
| <i>Success among high-technology firms</i>                                                                                        | Cooper and Bruno (1977)        | 30        |
| <i>What happens to gazelles? The importance of dynamic management strategy</i>                                                    | Parker et al. (2010)           | 31        |
| <i>A profile of new venture success and failure in an emerging industry</i>                                                       | Duchesneau and Gartner (1990)  | 32        |
| <i>Founding strategy and performance: A comparison of high and low growth high tech firms</i>                                     | Feeser and Willard (1990)      | 33        |
| <i>Market orientation, marketing capabilities, and firm performance</i>                                                           | Morgan et al. (2009)           | 34        |
| <i>Advancing firm growth research: A focus on growth mode instead of growth rate</i>                                              | McKelvie and Wiklund (2010)    | 35        |
| <i>A stage-contingent model of design and growth for technology based new ventures</i>                                            | Kazanjian and Drazin (1990)    | 36        |
| <i>High-impact firms: gazelles revisited</i>                                                                                      | Acs et al. (2008)              | 37        |
| <i>Hot spots and blind spots: geographical clusters of firms and innovation</i>                                                   | Pouder and John (1996)         | 38        |
| <i>Impact of entrepreneurial and management experience on early performance</i>                                                   | Stuart and Abetti (1990)       | 39        |
| <i>Start-up ventures: Towards the prediction of initial success</i>                                                               | Stuart and Abetti (1987)       | 40        |
| <i>Product innovation and small business growth: a comparison of the strategies of German, UK and Irish companies</i>             | Roper (1997)                   | 41        |
| <i>Clusters and the new economics of competition</i>                                                                              | Porter (1998)                  | 42        |
| <i>Characteristics distinguishing high-growth ventures</i>                                                                        | Siegel et al. (1993)           | 43        |
| <i>High-growth SMEs versus non-high-growth SMEs: a discriminant analysis</i>                                                      | Moreno and Casillas (2007)     | 44        |
| <i>Networking and growth of young technology-intensive ventures in China</i>                                                      | Zhao and Aram (1995)           | 45        |
| <i>Small firm growth</i>                                                                                                          | Davidsson et al. (2010)        | 46        |
| <i>Entrepreneurial networks and new organization growth</i>                                                                       | Hansen (1995)                  | 47        |
| <i>Is Extraordinary Growth Profitable? A Study of Inc. 500 High-Growth Companies</i>                                              | Markman and Gartner (2002)     | 48        |
| <i>Do small businesses create more jobs? New evidence for the United States from the National Establishment Time Series</i>       | Neumark et al. (2011)          | 49        |
| <i>Growth of new technology-based firms: which factors matter?</i>                                                                | Almus and Nerlinger (1999)     | 50        |
| <i>Firm networks: external relationships as sources for the growth and competitiveness of entrepreneurial firms</i>               | Lechner and Dowling (2003)     | 51        |
| <i>A longitudinal study of the relation of vision and vision communication to venture growth in entrepreneurial firms</i>         | Baum et al. (1998)             | 52        |
| <i>Technology strategy and software new ventures' performance: Exploring the moderating effect of the competitive environment</i> | Zahra and Bogner (2000)        | 53        |
| <i>Corporate ventures into industrial markets: Dynamics of aggressive entry</i>                                                   | MacMillan and Day (1988)       | 54        |
| <i>Do small innovating firms outperform non-innovators?</i>                                                                       | Freel (2000)                   | 55        |
| <i>Collective efficiency: Growth path for small-scale industry</i>                                                                | Schmitz (1995)                 | 56        |
| <i>Entrepreneurial orientation, learning orientation, and firm performance</i>                                                    | Wang (2008)                    | 57        |
| <i>Predictors of success in new technology based ventures</i>                                                                     | Roure and Keeley (1990)        | 58        |
| <i>High-growth entrepreneurial firms in Africa: a quantile regression approach</i>                                                | Goedhuys and Sleuwaegen (2010) | 59        |
| <i>New venture growth and personal networks</i>                                                                                   | Ostgaard and Birley (1996)     | 60        |
| <i>Employment effects of business dynamics: Mice, Gazelles and Elephants</i>                                                      | Acs and Mueller (2008)         | 61        |
| <i>Testing Gibrat's law for small, young and innovating firms</i>                                                                 | Calvo (2006)                   | 62        |

| <b>Title</b>                                                                                                                                         | <b>Reference</b>               | <b>ID</b> |
|------------------------------------------------------------------------------------------------------------------------------------------------------|--------------------------------|-----------|
| <i>Planning and financial performance of small, mature firms</i>                                                                                     | Bracker and Pearson (1986)     | 63        |
| <i>What characterizes a fast-growing firm?</i>                                                                                                       | Almus (2002)                   | 64        |
| <i>Firm growth: empirical analysis</i>                                                                                                               | Coad and Hözl (2012)           | 65        |
| <i>Small business growth through geographic expansion: a comparative case study</i>                                                                  | Barringer and Greening (1998)  | 66        |
| <i>Growth of micro and small enterprises in southern Africa</i>                                                                                      | McPherson (1996)               | 67        |
| <i>Managerial capabilities and paths to growth as determinants of high-growth small and medium-sized enterprises</i>                                 | Barbero et al. (2011)          | 68        |
| <i>Research on small firm growth: A review</i>                                                                                                       | Davidsson et al. (2005)        | 69        |
| <i>Firm growth, size, age and behavior in Japanese manufacturing</i>                                                                                 | Yasuda (2005)                  | 70        |
| <i>A social capital model of high-growth ventures</i>                                                                                                | Florin et al. (2003)           | 71        |
| <i>The performance implications of fit among business strategy</i>                                                                                   | Olson et al. (2005)            | 72        |
| <i>The growth of firms in theory and in practice</i>                                                                                                 | Geroski (1999)                 | 73        |
| <i>The effects of entrepreneurial personality, background and network activities on venture growth</i>                                               | Lee and Tsang (2001)           | 74        |
| <i>Is the R&amp;D Behaviour of Fast Growing SMEs Different?</i>                                                                                      | Hözl (2009)                    | 75        |
| <i>Market orientation and other potential influences on performance in small and medium-sized manufacturing firms</i>                                | Pelham (2000)                  | 76        |
| <i>Constellations of firms and new ventures</i>                                                                                                      | Lorenzoni and Ornati (1989)    | 77        |
| <i>High-growth firms and employment</i>                                                                                                              | Schreyer (2000)                | 78        |
| <i>Business Planning for New Ventures: A Guide for Start-ups and New Innovations</i>                                                                 | Butler (2014)                  | 79        |
| <i>Small vs. young firms across the world: contribution to employment, job creation, and growth</i>                                                  | Ayyagari et al. (2011)         | 80        |
| <i>The role of socially constructed temporal perspectives in the emergence of rapid growth firms</i>                                                 | Fischer et al. (1997)          | 81        |
| <i>The characteristics and strategies of high growth SMEs</i>                                                                                        | Smallbone et al. (1995)        | 82        |
| <i>Size of investment, opportunity choice and human resources in new venture growth: Some typologies</i>                                             | Thakur (1999)                  | 83        |
| <i>The small, the young, and the productive: Determinants of manufacturing firm growth in Ethiopia</i>                                               | Bigsten and Gebreeyesus (2007) | 84        |
| <i>The role of legal status in influencing bank financing and new firm growth</i>                                                                    | Storey (1994a)                 | 85        |
| <i>Determinants and dimensions of firm growth</i>                                                                                                    | Zhou and De Wit (2009)         | 86        |
| <i>The role of alliances in the early development of high-growth firms</i>                                                                           | Mohr et al. (2013)             | 87        |
| <i>Four years on—are the Gazelles still running? A longitudinal study of firm performance after a period of rapid growth</i>                         | Senderovitz et al. (2012)      | 88        |
| <i>The facts about growth</i>                                                                                                                        | Zook and Allen (1999)          | 89        |
| <i>Profitable business models and market creation in the context of deep poverty: A strategic view</i>                                               | Seelos and Mair (2007)         | 90        |
| <i>Dynamic capabilities and venture performance: The effects of venture capitalists</i>                                                              | Arthurs and Busenitz (2006)    | 91        |
| <i>The turnover of market leaders in UK manufacturing industry, 1979-86</i>                                                                          | Geroski and Toker (1996)       | 92        |
| <i>Contours of development</i>                                                                                                                       | Singer (1995)                  | 93        |
| <i>Small firm growth in developing countries</i>                                                                                                     | Nichter and Goldmark (2009)    | 94        |
| <i>Geographic cluster size and firm performance</i>                                                                                                  | Folta et al. (2006)            | 95        |
| <i>Entry barriers and new venture performance: a comparison of universal and contingency approaches</i>                                              | Robinson and McDougall (2001)  | 96        |
| <i>The effects of human capital, organizational demography, and interpersonal processes on venture partner perceptions of firm profit and growth</i> | Watson et al. (2003)           | 97        |
| <i>Firm resources as moderators of the relationship between market growth and strategic alliances in semiconductor start-ups</i>                     | Park et al. (2002)             | 98        |
| <i>Marketing for business growth</i>                                                                                                                 | Levitt and Levitt (1974)       | 99        |
| <i>Strategy process-content interaction: Effects on growth performance in small</i>                                                                  | Olson and Bokor (1995)         | 100       |

| <b>Title</b>                                                                                                                                                      | <b>Reference</b>                       | <b>ID</b> |
|-------------------------------------------------------------------------------------------------------------------------------------------------------------------|----------------------------------------|-----------|
| <i>The influence of guided preparation on the long-term performance of new ventures</i>                                                                           | Chrisman et al. (2005)                 | 101       |
| <i>Linking marketing capabilities with profit growth</i>                                                                                                          | Morgan et al. (2009)                   | 102       |
| <i>Competencies and institutions fostering high-growth firms</i>                                                                                                  | Henrekson and Johansson (2008)         | 103       |
| <i>Ideas and growth</i>                                                                                                                                           | Lucas (2009)                           | 104       |
| <i>A qualitative study of the management practices of rapid-growth firms and how rapid-growth firms mitigate the managerial capacity problem</i>                  | Barringer et al. (1998)                | 105       |
| <i>Growth Intention and Its Impact on Business Growth amongst SMEs in South Africa</i>                                                                            | Neneh and Vanzyl (2014)                | 106       |
| <i>Entrepreneurship as growth: Growth as entrepreneurship</i>                                                                                                     | Davidsson, Delmar and Wiklund (2006)   | 107       |
| <i>What makes a new business start-up successful?</i>                                                                                                             | Reid and Smith (2000)                  | 108       |
| <i>Will promoting more typical SME start-ups increase job creation in South Africa?</i>                                                                           | Neneh and Smit (2013)                  | 109       |
| <i>Edith Penrose's theory of the growth of the firm and the strategic management of multinational enterprises</i>                                                 | Buckley and Casson (2007)              | 110       |
| <i>Three strategies for managing fast growth</i>                                                                                                                  | Von Krogh and Cusumano (2001)          | 111       |
| <i>What's distinctive about growth-oriented entrepreneurship in developing countries?</i>                                                                         | Lingelbach, De La Vina and Asel (2005) | 112       |
| <i>Technological innovation and employment: complements or substitutes?</i>                                                                                       | Benavente and Lauterbach (2008)        | 113       |
| <i>Building the rural economy with high-growth entrepreneurs</i>                                                                                                  | Henderson (2002)                       | 114       |
| <i>Sustaining innovation and growth: Public policy support for entrepreneurship</i>                                                                               | Audretsch (2004)                       | 115       |
| <i>The effect of financial factors on the performance of new venture companies in high tech and knowledge-intensive industries: An empirical study in Denmark</i> | Bollingtoft et al. (2003)              | 116       |
| <i>Bankable Business Plans for Entrepreneurial Ventures</i>                                                                                                       | Rogoff (2007)                          | 117       |
| <i>The 7 irrefutable rules of small business growth</i>                                                                                                           | Little (2005)                          | 118       |
| <i>The rapid internationalisation of high-tech young firms in Germany and the United Kingdom</i>                                                                  | Fier et al. (2001)                     | 119       |
| <i>Entrepreneurial narratives and the dominant logics of high-growth firms</i>                                                                                    | Mishina et al. (2002)                  | 120       |
| <i>Strategy and Human Resource Management Integration in Fast Growth Versus Other Mid-sized Firms</i>                                                             | Buller and Napier (1993)               | 121       |
| <i>The Physics of Business Growth: Mindsets, System, and Processes</i>                                                                                            | Hess and Liedtka (2012)                | 122       |

## 2 B.2 Factors addressed in each literary source

The factors addressed in each literary source are shown in Table B2.

**Table B2.** Factors addressed in each literary source.

[illegible]

[illegible]

| ID  | Leadership qualities | Team size | Relevant industry | Level of education | Entrepreneurial | Entrepreneurial | Breadth of | Size and age | Legal form | Geographic location | Industry life cycle | Financial capital | Organisational | Vision, mission, and | Commitment to and | Strategy | Strategic alliances | Business planning | Marketing | International sales | Acquisition | Creating unique | Innovation | Human capital | Performance based |
|-----|----------------------|-----------|-------------------|--------------------|-----------------|-----------------|------------|--------------|------------|---------------------|---------------------|-------------------|----------------|----------------------|-------------------|----------|---------------------|-------------------|-----------|---------------------|-------------|-----------------|------------|---------------|-------------------|
| 79  |                      |           |                   |                    |                 |                 |            |              |            |                     |                     |                   |                |                      |                   | x        | x                   | x                 | x         |                     |             |                 | x          |               |                   |
| 80  |                      |           |                   |                    |                 |                 |            | x            |            |                     |                     |                   |                |                      |                   |          |                     |                   |           |                     |             |                 |            |               |                   |
| 81  |                      |           |                   |                    |                 |                 |            |              |            |                     |                     |                   |                |                      |                   | x        |                     | x                 |           |                     |             |                 |            |               |                   |
| 82  |                      |           |                   |                    |                 |                 |            |              |            |                     | x                   |                   |                |                      | x                 |          |                     |                   | x         |                     |             |                 |            |               |                   |
| 83  | x                    | x         |                   |                    |                 |                 |            |              |            |                     |                     |                   |                |                      |                   |          |                     |                   |           |                     |             |                 |            | x             |                   |
| 84  |                      |           |                   |                    |                 |                 |            | x            |            |                     |                     |                   |                |                      |                   |          |                     |                   |           |                     |             |                 |            |               |                   |
| 85  |                      |           |                   |                    |                 |                 |            |              | x          |                     |                     |                   |                |                      |                   |          |                     |                   |           |                     |             |                 |            |               |                   |
| 86  | x                    |           |                   | x                  |                 |                 |            | x            |            |                     | x                   | x                 | x              | x                    | x                 |          |                     |                   |           |                     |             |                 |            | x             |                   |
| 87  |                      |           |                   |                    |                 |                 |            |              |            |                     |                     | x                 |                |                      |                   |          | x                   |                   |           | x                   |             |                 |            |               |                   |
| 88  |                      |           |                   |                    |                 |                 |            |              |            |                     |                     |                   |                |                      |                   | x        |                     |                   |           |                     | x           |                 |            |               |                   |
| 89  | x                    |           |                   |                    |                 |                 |            | x            |            |                     | x                   |                   |                |                      |                   |          |                     |                   |           |                     |             |                 |            |               |                   |
| 90  |                      |           |                   |                    |                 |                 |            |              |            |                     |                     |                   |                |                      |                   |          |                     | x                 |           |                     |             |                 |            |               |                   |
| 91  |                      |           |                   |                    |                 |                 |            |              |            |                     |                     | x                 |                |                      |                   |          |                     |                   |           |                     |             |                 |            |               |                   |
| 92  |                      |           |                   |                    |                 |                 |            | x            |            |                     |                     |                   |                |                      |                   |          |                     |                   | x         |                     |             |                 | x          |               |                   |
| 93  |                      |           |                   |                    |                 |                 |            | x            |            |                     | x                   | x                 |                |                      |                   |          | x                   |                   |           |                     |             |                 |            |               |                   |
| 94  |                      |           | x                 | x                  |                 |                 | x          | x            |            |                     |                     | x                 | x              |                      |                   |          | x                   |                   |           |                     |             |                 |            |               |                   |
| 95  |                      |           |                   |                    |                 |                 |            |              |            | x                   |                     |                   |                |                      |                   |          | x                   |                   |           |                     |             |                 |            |               |                   |
| 96  |                      |           |                   |                    |                 |                 |            |              |            |                     | x                   |                   |                |                      |                   | x        |                     |                   |           |                     |             |                 |            |               |                   |
| 97  | x                    |           |                   | x                  |                 |                 |            |              |            |                     | x                   |                   |                |                      |                   |          |                     |                   |           |                     |             |                 |            | x             |                   |
| 98  |                      |           |                   |                    |                 |                 |            |              |            |                     |                     | x                 |                |                      |                   |          | x                   |                   |           |                     |             |                 |            |               |                   |
| 99  |                      |           |                   |                    |                 |                 |            |              |            |                     |                     |                   |                |                      |                   | x        |                     | x                 | x         |                     |             |                 | x          |               |                   |
| 100 |                      |           |                   |                    |                 |                 |            |              |            |                     |                     |                   |                |                      |                   | x        |                     |                   |           |                     |             |                 |            |               |                   |
| 101 |                      |           |                   |                    |                 |                 |            |              |            |                     |                     |                   |                |                      |                   |          |                     | x                 |           |                     |             |                 |            |               |                   |
| 102 |                      |           |                   |                    |                 |                 |            |              |            |                     |                     |                   |                |                      |                   |          |                     |                   | x         |                     |             |                 |            |               |                   |
| 103 |                      |           |                   |                    |                 |                 |            | x            |            |                     | x                   |                   |                |                      |                   |          |                     |                   |           |                     |             |                 |            |               |                   |
| 104 |                      |           |                   | x                  |                 |                 |            |              |            |                     |                     |                   |                |                      |                   |          |                     |                   |           |                     |             |                 |            | x             |                   |
| 105 |                      |           |                   |                    |                 |                 |            |              |            |                     |                     |                   | x              |                      |                   |          | x                   | x                 | x         |                     |             |                 |            | x             | x                 |
| 106 |                      |           | x                 | x                  | x               |                 |            |              |            |                     |                     | x                 |                |                      |                   | x        |                     |                   |           |                     |             |                 |            |               |                   |
| 107 |                      |           |                   |                    |                 | x               |            |              |            |                     |                     |                   |                |                      |                   | x        |                     |                   |           |                     |             |                 |            |               |                   |
| 108 |                      |           |                   |                    |                 |                 |            |              |            |                     |                     |                   |                |                      |                   | x        |                     |                   |           |                     |             |                 |            |               |                   |
| 109 |                      |           |                   |                    |                 |                 |            |              |            |                     |                     |                   |                |                      | x                 |          |                     |                   | x         |                     |             |                 | x          | x             |                   |
| 110 |                      |           |                   |                    |                 |                 |            |              |            |                     |                     |                   |                |                      |                   | x        |                     |                   |           | x                   |             |                 | x          |               |                   |
| 111 |                      |           |                   |                    |                 |                 |            |              |            |                     | x                   |                   |                | x                    | x                 | x        |                     |                   |           |                     |             |                 |            |               |                   |
| 112 |                      |           |                   |                    |                 |                 |            |              |            |                     |                     | x                 |                |                      |                   | x        | x                   | x                 | x         |                     |             |                 | x          |               |                   |
| 113 |                      |           |                   |                    |                 |                 |            |              |            |                     |                     |                   |                |                      |                   |          |                     |                   |           |                     |             |                 | x          |               |                   |
| 114 |                      |           |                   |                    |                 |                 |            | x            |            | x                   |                     |                   |                |                      | x                 |          |                     |                   |           |                     |             |                 |            | x             |                   |
| 115 |                      |           |                   |                    |                 |                 |            |              |            |                     |                     |                   |                |                      |                   |          |                     |                   |           |                     |             |                 | x          |               |                   |
| 116 |                      |           |                   |                    |                 |                 | x          |              | x          |                     | x                   | x                 |                |                      |                   |          |                     |                   |           |                     |             |                 |            |               |                   |
| 117 |                      |           |                   |                    |                 |                 |            |              |            |                     |                     |                   |                |                      |                   | x        | x                   | x                 | x         |                     |             |                 | x          |               |                   |
| 118 |                      |           |                   |                    |                 |                 |            |              |            |                     |                     |                   |                |                      |                   | x        | x                   | x                 | x         |                     |             |                 | x          |               |                   |
| 119 |                      |           | x                 |                    | x               |                 |            | x            |            |                     |                     |                   |                |                      |                   |          |                     |                   |           | x                   |             |                 | x          |               |                   |
| 120 |                      |           |                   |                    |                 |                 |            |              |            |                     |                     |                   |                |                      | x                 | x        |                     |                   |           |                     |             |                 |            |               |                   |
| 121 |                      |           |                   |                    |                 |                 |            |              |            |                     | x                   |                   |                |                      |                   | x        |                     |                   |           |                     |             |                 |            | x             |                   |
| 122 |                      |           |                   |                    |                 |                 |            |              |            |                     |                     |                   |                |                      |                   | x        | x                   | x                 | x         |                     |             |                 | x          |               |                   |



| Reference                  | Leadership qualities | Team size | Relevant industry experience | Level of education | Entrepreneurial experience | Entrepreneurial orientation | Breadth of professional and social network | Size and age | Legal form | Geographic location and expansion | Industry life cycle stage and market | Financial capital | Organisational structure | Vision, mission, and communication | Commitment to and motivation for growth | Strategy | Strategic alliances | Business planning | Marketing capabilities | International sales | Acquisition | Creating unique value for customers | Innovation | Human capital | Performance based incentives |
|----------------------------|----------------------|-----------|------------------------------|--------------------|----------------------------|-----------------------------|--------------------------------------------|--------------|------------|-----------------------------------|--------------------------------------|-------------------|--------------------------|------------------------------------|-----------------------------------------|----------|---------------------|-------------------|------------------------|---------------------|-------------|-------------------------------------|------------|---------------|------------------------------|
| Deeds and Hill (1996)      |                      |           |                              |                    |                            |                             |                                            |              |            |                                   |                                      |                   |                          |                                    |                                         |          | x                   |                   |                        |                     |             |                                     |            |               |                              |
| Deeds et al. (2000)        |                      |           | x                            |                    | x                          |                             |                                            |              |            | x                                 |                                      |                   |                          |                                    |                                         |          |                     |                   |                        |                     |             |                                     |            | x             |                              |
| Denckler et al. (2009)     | x                    |           | x                            |                    |                            |                             |                                            |              |            |                                   |                                      |                   |                          |                                    |                                         |          |                     |                   |                        |                     |             |                                     |            |               |                              |
| Forbes (2005)              |                      |           |                              |                    | x                          |                             |                                            |              |            |                                   |                                      |                   |                          |                                    |                                         |          |                     |                   |                        |                     |             |                                     |            |               |                              |
| Goddard et al. (2002)      |                      |           |                              |                    |                            |                             |                                            | x            |            |                                   |                                      |                   |                          |                                    |                                         |          |                     |                   |                        |                     |             |                                     |            |               |                              |
| Goldmark and Barber (2005) |                      |           |                              |                    |                            |                             | x                                          |              |            |                                   |                                      |                   |                          |                                    |                                         |          |                     |                   |                        | x                   |             |                                     |            |               |                              |
| Hannan and Carroll (1992)  |                      |           |                              |                    |                            |                             |                                            |              | x          |                                   | x                                    |                   |                          |                                    |                                         |          | x                   |                   |                        |                     |             |                                     |            |               |                              |
| Harrison et al. (2008)     |                      |           |                              |                    |                            |                             |                                            |              |            |                                   |                                      |                   |                          |                                    |                                         |          |                     |                   |                        |                     |             | x                                   |            |               |                              |
| Haynie et al. (2010)       |                      |           |                              |                    | x                          |                             |                                            |              |            |                                   |                                      |                   |                          |                                    |                                         |          |                     |                   |                        |                     |             |                                     |            |               |                              |
| Headd (2010)               |                      |           |                              |                    |                            |                             |                                            | x            |            |                                   |                                      |                   |                          |                                    |                                         |          |                     |                   |                        |                     |             |                                     |            |               |                              |
| Humphrey (2003)            |                      |           |                              |                    |                            |                             | x                                          |              |            | x                                 |                                      |                   |                          |                                    |                                         |          | x                   |                   |                        |                     |             |                                     |            |               |                              |
| Knight et al. (2001)       |                      |           |                              |                    |                            |                             |                                            |              |            |                                   |                                      |                   |                          |                                    | x                                       |          |                     |                   |                        |                     |             |                                     |            | x             |                              |
| Landy and Becker (1987)    |                      |           |                              |                    |                            |                             |                                            |              |            |                                   |                                      |                   |                          |                                    | x                                       |          |                     |                   |                        |                     |             |                                     |            |               |                              |
| Locke (2000)               |                      |           |                              |                    |                            |                             |                                            |              |            |                                   |                                      |                   |                          | x                                  | x                                       |          |                     |                   |                        |                     |             |                                     |            |               |                              |
| Mullins (1996)             |                      |           |                              | x                  |                            |                             |                                            |              |            |                                   |                                      |                   |                          |                                    |                                         |          |                     |                   |                        |                     |             |                                     |            | x             |                              |
| Nooteboom (1994)           |                      |           |                              |                    |                            |                             |                                            |              |            |                                   |                                      |                   |                          |                                    |                                         |          |                     |                   |                        |                     |             | x                                   |            |               |                              |
| Oliver and Anderson (1995) |                      |           |                              |                    |                            |                             |                                            |              |            |                                   |                                      |                   |                          |                                    |                                         |          |                     |                   |                        |                     |             |                                     |            | x             |                              |
| Pearce and Michael (2006)  |                      |           |                              |                    |                            |                             |                                            |              |            | x                                 |                                      |                   |                          |                                    |                                         | x        |                     |                   | x                      |                     |             |                                     |            |               |                              |
| Ryals (2005)               |                      |           |                              |                    |                            |                             |                                            |              |            |                                   |                                      |                   |                          |                                    |                                         |          |                     |                   | x                      |                     |             |                                     |            |               |                              |
| Sirmon et al. (2010)       |                      |           |                              |                    |                            |                             |                                            |              |            |                                   |                                      |                   |                          |                                    |                                         | x        |                     |                   |                        |                     |             |                                     |            |               |                              |

[illegible]
